# Supplementary material for: Density functional theory study of a two-atom active site transition-metal/iridium electrocatalyst for ammonia synthesis
Source: Royal Society of Chemistry journal article supplement (doi:10.1039/d2ta02642b), 2022-01-01
Supplement: d2ta02642b1.pdf [file d2ta02642b1.pdf]

## Supporting Information

### Density functional theory study of two-atom active site transition-metal/iridium electrocatalyst for ammonia synthesis

**Wei Song<sup>a</sup>, Zhe Fu<sup>e</sup>, Xiao Liu<sup>a</sup>, Yongliang Guo<sup>a</sup>, Chaozheng He<sup>b,c\*</sup>, Ling Fu<sup>d\*</sup>**

*<sup>a</sup>School of Science, Henan Institute of Technology, Xinxiang, 453003, P.R. China*

*<sup>b</sup>School of Materials Science and Chemical Engineering, Xi'an Technological University, Xi'an, 710021, P. R. China*

*<sup>c</sup>Institute of Environmental and Energy Catalysis, School of Materials Science and Chemical Engineering, Xi'an Technological University, Xi'an, 710021, P. R. China*

*<sup>d</sup>College of Resources and Environmental Engineering, Tianshui Normal University, Tianshui, 741001, P.R. China*

*<sup>e</sup>Department of Electronic Communication Engineering, Xinxiang University, Xinxiang, 453003, P.R. China*

**\*Corresponding authors:**

**E-mail: ful263@nenu.edu.cn (L. Fu); hecz2019@xatu.edu.cn (C. He)**

**Table S1** The formation energy ( $E_f$  in eV) of two TM (TM=Ti–Zn) atoms doped Ir(100).

|                                | $E_f$ (eV) | $E_{\text{coh}}$ (eV) | $\Delta E$ (eV) |
|--------------------------------|------------|-----------------------|-----------------|
| Ti <sub>2</sub> @Ir(100)-para  | -14.322    | -6.303                | -8.019          |
| V <sub>2</sub> @Ir(100)-para   | -14.034    | -7.287                | -6.747          |
| Cr <sub>2</sub> @Ir(100)-para  | -11.115    | -6.753                | -4.362          |
| Mn <sub>2</sub> @Ir(100)-para  | -6.231     | -4.462                | -1.769          |
| Fe <sub>2</sub> @Ir(100)-para  | -8.288     | -5.609                | -2.679          |
| Co <sub>2</sub> @Ir(100)-para  | -9.640     | -6.132                | -3.508          |
| Ni <sub>2</sub> @Ir(100)-para  | -9.520     | -5.732                | -3.788          |
| Cu <sub>2</sub> @Ir(100)-para  | -6.269     | -4.218                | -2.051          |
| Zn <sub>2</sub> @Ir(100)-para  | -2.669     | -0.233                | -2.436          |
| Ti <sub>2</sub> @Ir(100)-ortho | -14.099    | -6.303                | -7.796          |
| V <sub>2</sub> @Ir(100)-ortho  | -13.766    | -7.287                | -6.479          |
| Cr <sub>2</sub> @Ir(100)-ortho | -10.881    | -6.753                | -4.128          |
| Mn <sub>2</sub> @Ir(100)-ortho | -6.191     | -4.462                | -1.729          |
| Fe <sub>2</sub> @Ir(100)-ortho | -8.312     | -5.609                | -2.703          |
| Co <sub>2</sub> @Ir(100)-ortho | -9.854     | -6.132                | -3.722          |
| Ni <sub>2</sub> @Ir(100)-ortho | -9.787     | -5.732                | -3.955          |
| Cu <sub>2</sub> @Ir(100)-ortho | -6.453     | -4.218                | -2.235          |
| Zn <sub>2</sub> @Ir(100)-ortho | -2.857     | -0.233                | -2.624          |

**Table S2** The N–N bond length ( $d_{\text{N-N}}$  in Å) and adsorption energy ( $E_{\text{ads}}$  in eV) of  $\text{N}_2$  on different sites of  $\text{TM}_2@{\text{Ir}}(100)\text{-para}$  (TM= Ti, V, Cr, Mn, and Fe).

| S1 site   | $d_{\text{N-N}}$ (Å) | $E_{\text{ads}}$ (eV) | S2 site | $d_{\text{N-N}}$ (Å) | $E_{\text{ads}}$ (eV) |
|-----------|----------------------|-----------------------|---------|----------------------|-----------------------|
| Ti        | —                    | —                     | Ti      | 1.180                | -0.765                |
| V         | —                    | —                     | V       | 1.182                | -0.822                |
| Cr        | —                    | —                     | Cr      | 1.180                | -1.002                |
| Mn        | —                    | —                     | Mn      | 1.178                | -0.888                |
| Fe        | —                    | —                     | Fe      | 1.175                | -1.398                |
| S3 site   | $d_{\text{N-N}}$ (Å) | $E_{\text{ads}}$ (eV) | S4 site | $d_{\text{N-N}}$ (Å) | $E_{\text{ads}}$ (eV) |
| <b>Ti</b> | <b>1.278</b>         | <b>-1.431</b>         | Ti      | 1.175                | -0.306                |
| <b>V</b>  | <b>1.287</b>         | <b>-1.370</b>         | V       | 1.172                | -0.273                |
| <b>Cr</b> | <b>1.292</b>         | <b>-1.334</b>         | Cr      | 1.164                | -0.485                |
| <b>Mn</b> | <b>1.289</b>         | <b>-1.270</b>         | Mn      | 1.135                | -0.513                |
| <b>Fe</b> | <b>1.286</b>         | <b>-1.123</b>         | Fe      | 1.135                | -1.188                |
| S5 site   | $d_{\text{N-N}}$ (Å) | $E_{\text{ads}}$ (eV) |         |                      |                       |
| Ti        | 1.140                | -1.201                |         |                      |                       |
| V         | 1.137                | -1.143                |         |                      |                       |
| Cr        | 1.137                | -1.428                |         |                      |                       |
| Mn        | 1.132                | -1.332                |         |                      |                       |
| Fe        | 1.135                | -1.587                |         |                      |                       |

**Table S3** The N–N bond length ( $d_{\text{N-N}}$  in Å) and adsorption energy ( $E_{\text{ads}}$  in eV) of  $\text{N}_2$  on different sites of  $\text{TM}_2@{\text{Ir}}(100)\text{-ortho}$  (TM= Mn, Fe, Co, Ni, Cu, and Zn).

|         |                      |                       |           |                      |                       |
|---------|----------------------|-----------------------|-----------|----------------------|-----------------------|
| S1 site | $d_{\text{N-N}}$ (Å) | $E_{\text{ads}}$ (eV) | S2 site   | $d_{\text{N-N}}$ (Å) | $E_{\text{ads}}$ (eV) |
| Mn      | 1.242                | −1.761                | Mn        | —                    | —                     |
| Fe      | 1.235                | −1.208                | Fe        | 1.168                | −1.514                |
| Co      | 1.208                | −0.498                | Co        | 1.164                | −0.742                |
| Ni      | 1.218                | −0.384                | Ni        | 1.160                | −0.483                |
| Cu      | 1.176                | −0.556                | Cu        | 1.137                | −0.066                |
| Zn      | 1.176                | −0.611                | Zn        | 1.118                | −0.157                |
| S3 site | $d_{\text{N-N}}$ (Å) | $E_{\text{ads}}$ (eV) | S4 site   | $d_{\text{N-N}}$ (Å) | $E_{\text{ads}}$ (eV) |
| Mn      | 1.176                | −0.915                | <b>Mn</b> | <b>1.290</b>         | <b>−1.451</b>         |
| Fe      | 1.172                | −0.862                | <b>Fe</b> | <b>1.283</b>         | <b>−1.282</b>         |
| Co      | 1.168                | −0.484                | <b>Co</b> | <b>1.277</b>         | <b>−0.764</b>         |
| Ni      | 1.167                | −0.477                | <b>Ni</b> | <b>1.266</b>         | <b>−0.725</b>         |
| Cu      | 1.135                | −0.996                | <b>Cu</b> | <b>1.255</b>         | <b>−0.319</b>         |
| Zn      | 1.135                | −1.025                | <b>Zn</b> | <b>1.259</b>         | <b>−0.088</b>         |
| S5 site | $d_{\text{N-N}}$ (Å) | $E_{\text{ads}}$ (eV) | S6 site   | $d_{\text{N-N}}$ (Å) | $E_{\text{ads}}$ (eV) |
| Mn      | —                    | —                     | Mn        | 1.132                | −1.386                |
| Fe      | —                    | —                     | Fe        | —                    | —                     |
| Co      | —                    | —                     | Co        | —                    | —                     |
| Ni      | 1.263                | −0.657                | Ni        | —                    | —                     |
| Cu      | 1.241                | −0.169                | Cu        | —                    | —                     |
| Zn      | 1.240                | −0.101                | Zn        | —                    | —                     |
| S7 site | $d_{\text{N-N}}$ (Å) | $E_{\text{ads}}$ (eV) | S8 site   | $d_{\text{N-N}}$ (Å) | $E_{\text{ads}}$ (eV) |
| Mn      | 1.131                | −1.993                | Mn        | 1.188                | −1.440                |
| Fe      | 1.137                | −1.749                | Fe        | 1.133                | −1.886                |
| Co      | 1.135                | −0.972                | Co        | —                    | —                     |
| Ni      | 1.130                | −0.793                | Ni        | 1.132                | −0.790                |
| Cu      | 1.126                | −0.368                | Cu        | 1.135                | −0.996                |
| Zn      | 1.118                | −0.156                | Zn        | 1.135                | −1.024                |

Notes: “—” means that  $\text{N}_2$  cannot be stably adsorbed at this site or has been adsorbed to other sites.

**Table S4** Total magnetic moment ( $M$  in  $\mu_B$ ) of  $Mn_2@Ir(100)$  and  $Fe_2@Ir(100)$  .

|                   | $Mn_2@Ir(100)$ -para | $Mn_2@Ir(100)$ -ortho | $Fe_2@Ir(100)$ -para | $Fe_2@Ir(100)$ -ortho |
|-------------------|----------------------|-----------------------|----------------------|-----------------------|
| $M$ (in $\mu_B$ ) | 2.927                | 3.423                 | 2.699                | 1.162                 |

**Table S5** The adsorption energy ( $E_{ads}$  in eV), Bader charge ( $Q$  in  $e$ ) and N–N bond length ( $d_{N-N}$  in  $\text{\AA}$ ) of  $N_2$  on  $Mn_2@Ir(100)$ -para using DFT and DFT+U calculation, respectively.

| $Mn_2@Ir(100)$ -para | $E_{ads}$ (eV) | $Q$ ( $e$ ) | $d_{N-N}$ ( $\text{\AA}$ ) |
|----------------------|----------------|-------------|----------------------------|
| DFT                  | -1.270         | 1.167       | 1.289                      |
| DFT+U                | -1.201         | 1.165       | 1.285                      |

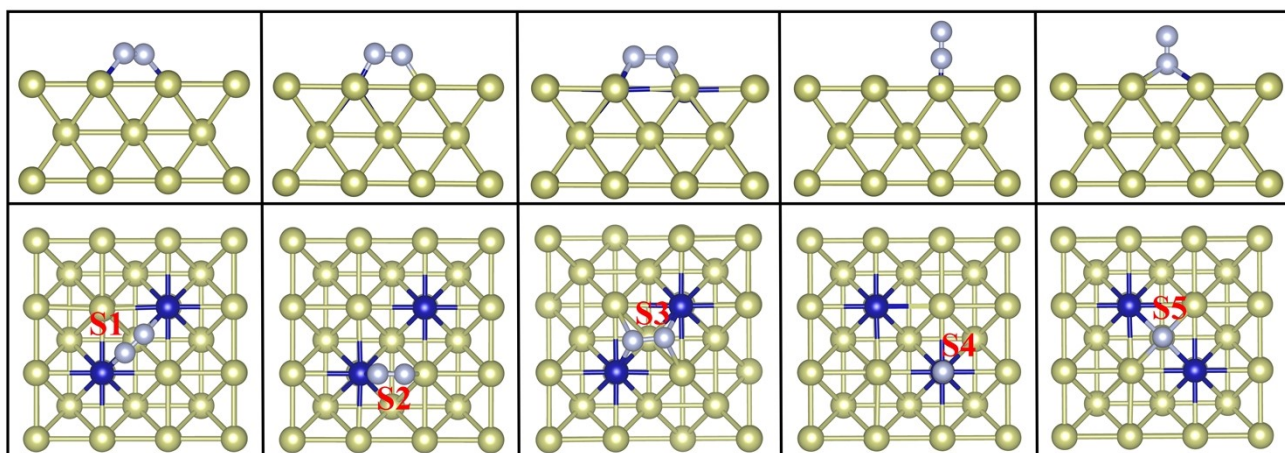

**Fig. S1.** Side and top view of  $N_2$  adsorption on different sites of  $TM_2@Ir(100)$ -para.

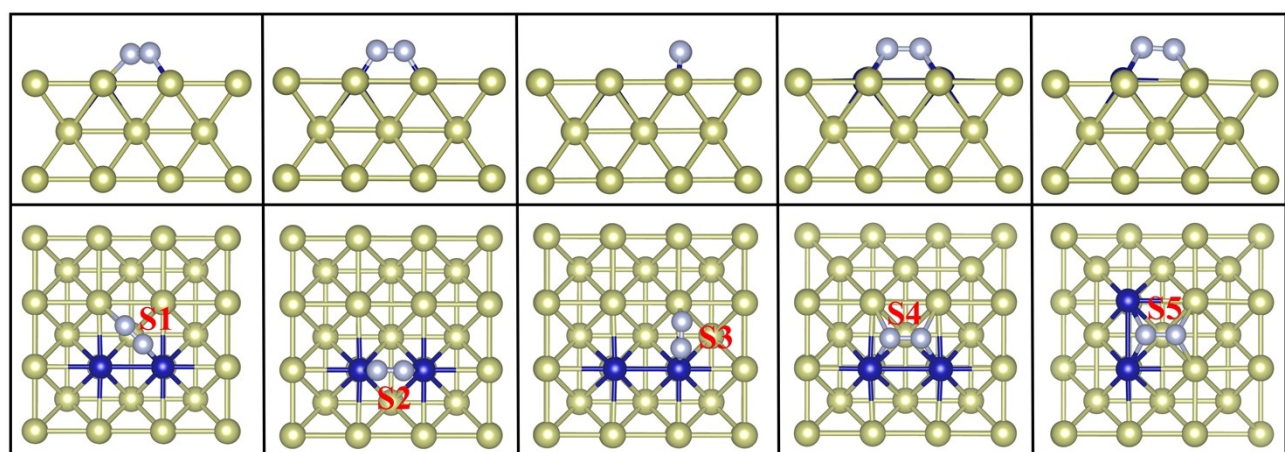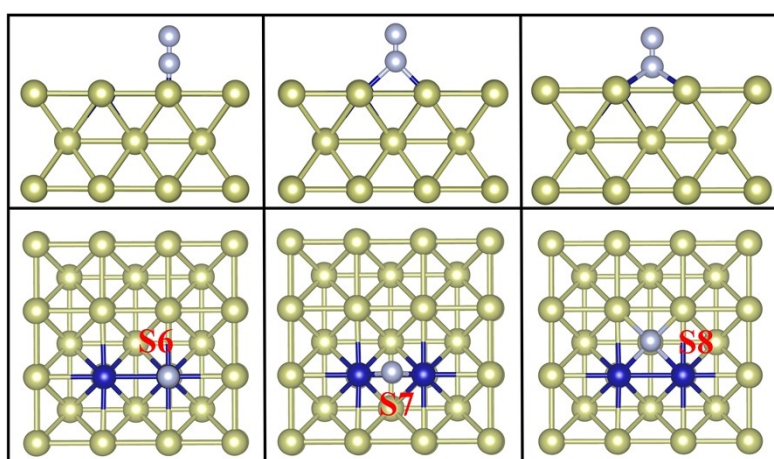

**Fig. S2.** Side and top view of  $N_2$  adsorption on different sites of  $TM_2@Ir(100)$ -ortho.

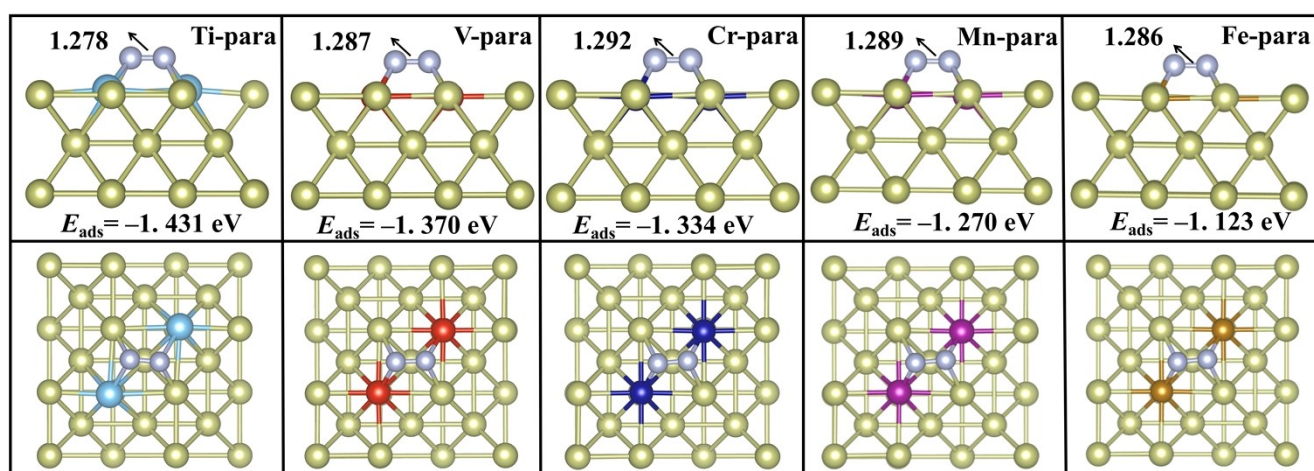

**Fig. S3.** The most stable structures and corresponding adsorption energy ( $E_{\text{ads}}$  in eV) as well as N–N bond length ( $d_{\text{N-N}}$  in Å) of  $\text{N}_2$  adsorption on  $\text{TM}_2@Ir(100)$ -para (TM= Ti, V, Cr, Mn, and Fe).

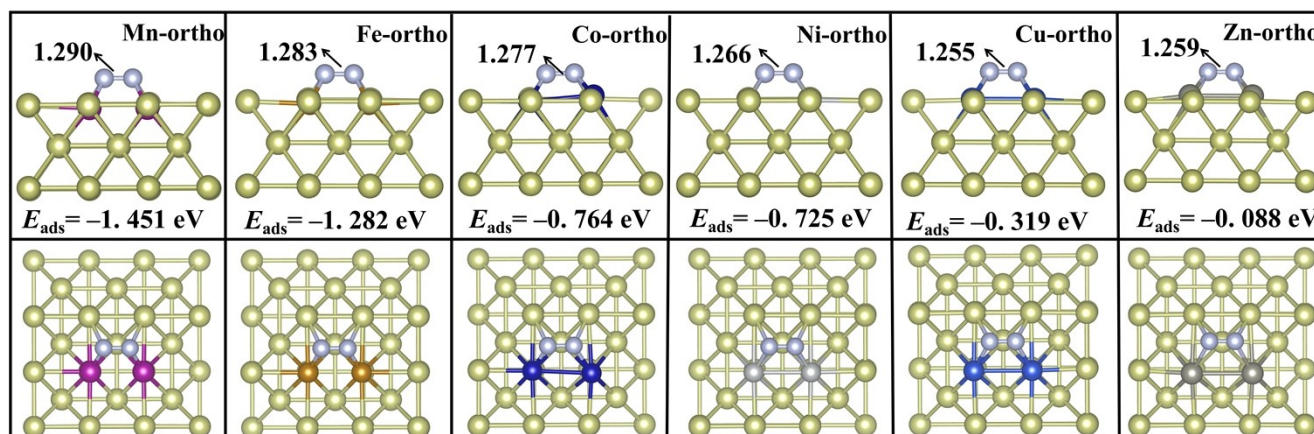

**Fig. S4.** The most stable structures and corresponding adsorption energy ( $E_{\text{ads}}$  in eV) as well as N–N bond length ( $d_{\text{N-N}}$  in Å) of  $\text{N}_2$  adsorption on  $\text{TM}_2@Ir(100)$ -ortho (TM= Mn, Fe, Co, Ni, Cu, and Zn).

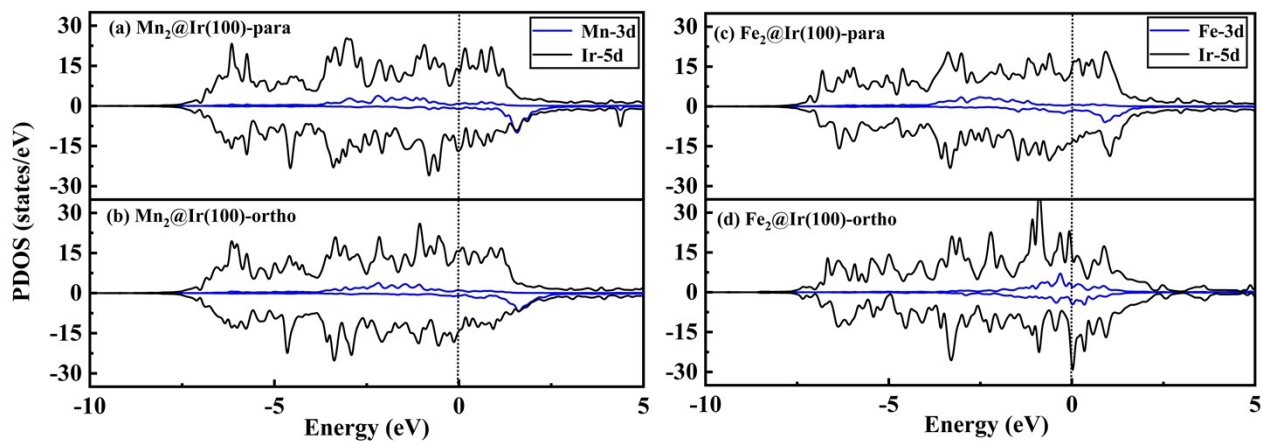

**Fig. S5.** The calculated partial density of states (PDOS) of (a)  $\text{Mn}_2@Ir(100)$ -para, (b)  $\text{Mn}_2@Ir(100)$ -ortho, (c)  $\text{Fe}_2@Ir(100)$ -para, and (d)  $\text{Fe}_2@Ir(100)$ -ortho, respectively. The Fermi level is set to zero in the dotted line.

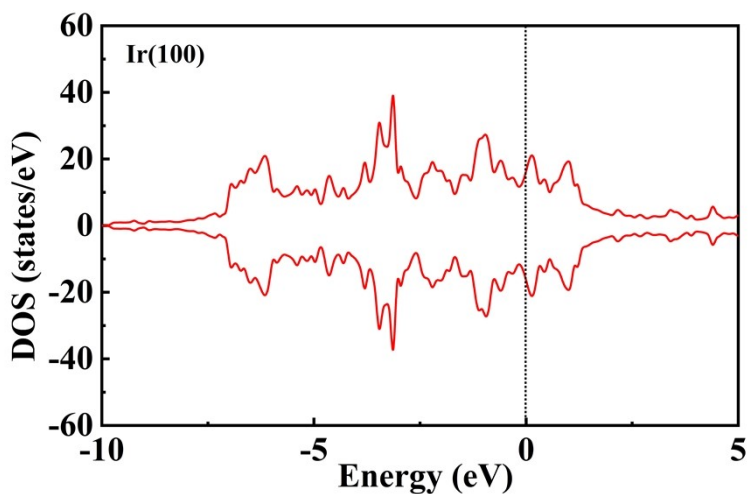

**Fig. S6.** The calculated density of states (DOS) of Ir(100). The Fermi level is set to zero in the dotted line.



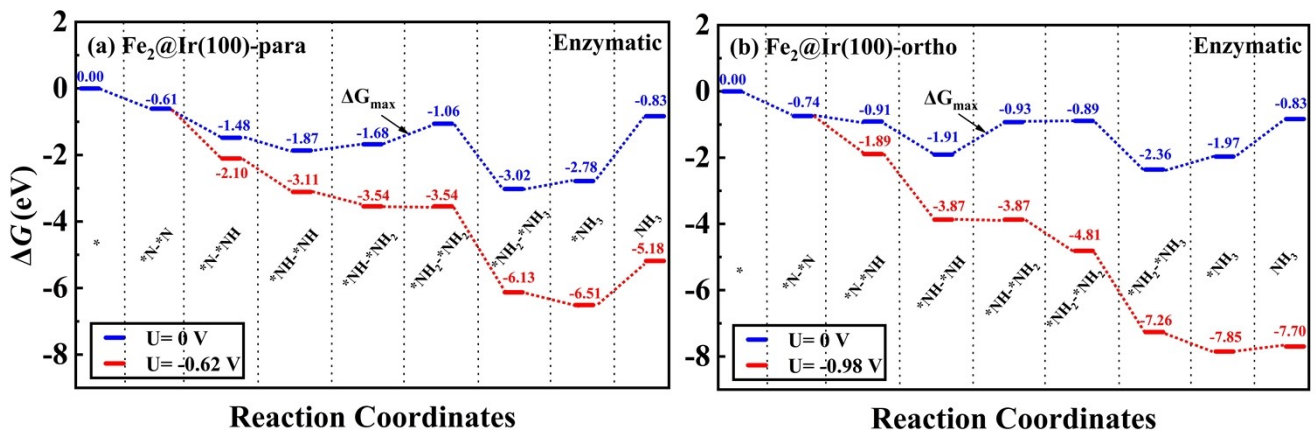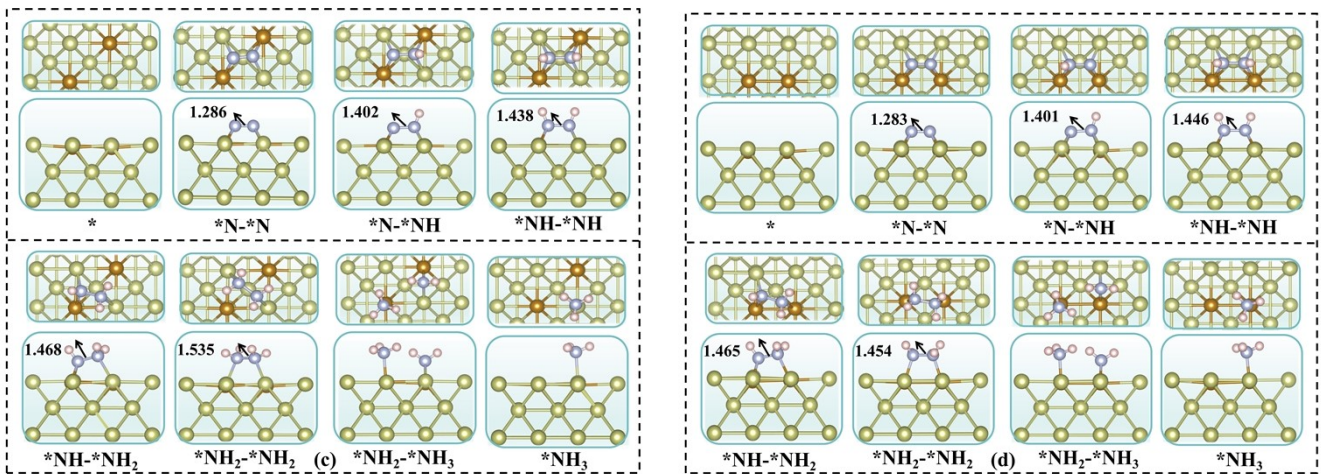

**Fig. S7.** Gibbs free energy diagrams of the NRR process at zero (blue lines) and applied potential (red lines) of various reaction intermediates adsorption on (a) Fe<sub>2</sub>@Ir(100)-para and (b) Fe<sub>2</sub>@Ir(100)-ortho via the enzymatic pathway; (c) and (d) the corresponding optimized geometric structures, respectively.

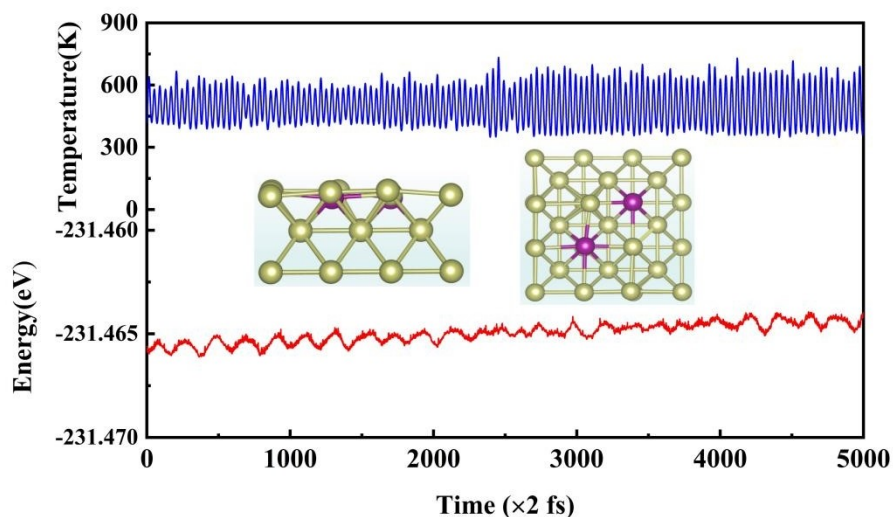

**Fig. S8.** The temperature and energy fluctuations of  $\text{Mn}_2@Ir(100)\text{-para}$  during 10ps of AIMD simulation. The insets illustrate the top and side view of  $\text{Mn}_2@Ir(100)\text{-para}$  after 10ps AIMD simulation at  $T = 500\text{K}$ .

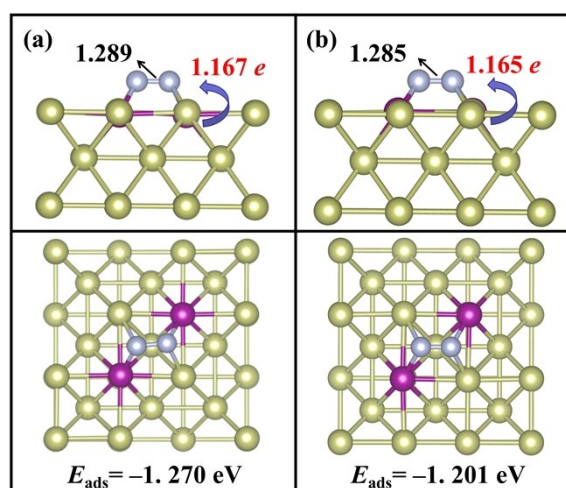

**Fig. S9.** The optimized adsorption structures of  $\text{N}_2$  on  $\text{Mn}_2@Ir(100)\text{-para}$  using (a) DFT and (b) DFT+U calculation.
